# Supplementary material
Source: publisher site journal article supplement (https://www.dovepress.com/article/595625)
Supplement: Supplementary file 1 [file 595625%20Supplementary%20Material.docx]

Supplementary Table S1. Included vs excluded baseline comparison

| **Variable** | **Included**  **(n=1,753)** | **Excluded**  **(n=8,030)** | **P value** | **Adjusted P value (BH)** |
| --- | --- | --- | --- | --- |
| Age (years) | 48.04±6.77 | 53.10±9.04 | <0.001* | <0.001* |
| Male, n (%) | 908 (51.8%) | 3763 (46.9%) | <0.001* | <0.001* |
| BMI (kg/m²) | 24.66±2.83 | 24.59±3.18 | 0.515 | 0.515 |
| Current smoker, n (%) | 376 (21.5%) | 2134 (26.9%) | <0.001* | <0.001* |
| Smoking exposure (pack-years) | 20.06±15.37 | 24.13±17.67 | <0.001* | <0.001* |
| Medication use for ≥3 months, n (%) | 0 (0.0%) | 3743 (49.8%) | — | — |
| Chronic cough, n (%) | 46 (2.6%) | 361 (4.6%) | <0.001* | <0.001* |
| Wheeze, n (%) | 73 (4.2%) | 769 (9.7%) | <0.001* | <0.001* |
| Asthma history, n (%) | 18 (1.0%) | 184 (2.3%) | <0.001* | <0.001* |
| Hypertension, n (%) | 59 (3.4%) | 1448 (18.0%) | <0.001* | <0.001* |
| Diabetes, n (%) | 34 (1.9%) | 624 (7.8%) | <0.001* | <0.001* |
| Cardiovascular disease, n (%) | 5 (0.3%) | 101 (1.3%) | <0.001* | <0.001* |
| FEV1/FVC (%) | 75.34 ± 1.54 | 74.41 ± 1.92 | <0.001* | <0.001* |
| FEV1 (% predicted) | 113.26±14.76 | 111.51±18.31 | 0.003* | 0.003* |
| Values are presented as mean ± standard deviation or number (%). Adjusted P values were calculated using the Benjamini–Hochberg (BH) method. * indicates statistical significance at an adjusted P value < 0.05. | | | | |
